# Supplementary material for: An interchange property for the rooted phylogenetic subnet diversity on phylogenetic networks
Source: PubMed Central journal article supplement (PMC11452452; doi:10.1007/s00285-024-02142-4), 2024-10-04
Supplement: 285_2024_2142_MOESM1_ESM.pdf [file 285_2024_2142_MOESM1_ESM.pdf]

# An interchange property for the rooted Phylogenetic Subnet Diversity on phylogenetic networks.

## Supplementary Material

Tomás M. Coronado<sup>1</sup>, Gabriel Riera<sup>1</sup>, Francesc Rosselló<sup>1</sup>

<sup>1</sup>Dept. of Mathematics and Computer Science, University of the Balearic Islands, Palma, E-07122, Spain, and Balearic Islands Health Research Institute (IdISBa), Palma, E-07010, Spain

[t.martinez,gabriel.riera,cesc.rossello}@uib.eu](mailto:{t.martinez,gabriel.riera,cesc.rossello}@uib.eu).

### 1 Proof of Lemma 9

Given a blob  $\mathcal{B}$  with set of exit reticulations  $\mathcal{E}$  and a subset  $\mathcal{E}_1 \subseteq \mathcal{E}$ , we denote by  $\uparrow_{\mathcal{B}, \text{only}} \mathcal{E}_1$  the set of nodes of  $\mathcal{B}$  with all their descendant exit reticulations in  $\mathcal{E}_1$ :

$$\uparrow_{\mathcal{B}, \text{only}} \mathcal{E}_1 = \uparrow \mathcal{E}_1 \setminus \uparrow(\mathcal{E} \setminus \mathcal{E}_1) = V(\mathcal{B}) \setminus \uparrow(\mathcal{E} \setminus \mathcal{E}_1).$$

This notation extends the notation  $\uparrow_{\text{only}} H$  for  $H \in \mathcal{E}$  used in the proof of Lemma 10.

We shall actually prove a slightly more general result than Lemma 9:

**Lemma 11.** *Let  $\mathcal{B}$  be a blob, let  $\mathcal{E}_1$  be a subset of its exit reticulations, and let  $\mathcal{I}_1$  be the set of its internal reticulations belonging to  $\uparrow_{\mathcal{B}, \text{only}}(\mathcal{E}_1)$ . Then, for every independent set of nodes  $V$  contained in  $\uparrow_{\mathcal{B}, \text{only}}(\mathcal{E}_1)$ ,*

$$|V| \leq \sum_{H_i \in \mathcal{E}_1} \deg_{\text{in}} H_i + \sum_{H_i \in \mathcal{I}_1} (\deg_{\text{in}} H_i - 1).$$

*Proof.* Let  $\mathcal{I}$  and  $\mathcal{E}$  be the sets of internal and exit reticulations, respectively, of the blob  $\mathcal{B}$ . Let  $\mathcal{E}_1 = \{H_1, \dots, H_{l_1}\} \subseteq \mathcal{E}$  and  $\mathcal{I}_1 = \mathcal{I} \cap \uparrow_{\mathcal{B}, \text{only}}(\mathcal{E}_1) = \{H_{l_1+1}, \dots, H_{l_1+k_1}\}$ . For each  $i = 1, \dots, l_1+k_1$ , let  $d_i = \deg_{\text{in}} H_i$ . We shall prove that, for every independent

subset  $V$  of  $\uparrow_{\mathcal{B}, \text{only}} \mathcal{E}_1$ ,

$$|V| \leq \sum_{i=1}^{l_1} d_i + \sum_{i=l_1+1}^{l_1+k_1} (d_i - 1)$$

by double induction on  $l_1 = |\mathcal{E}_1|$  and  $k_{int} = |Z|$ . The case when  $l_1 = 0$  is obvious, because then  $\uparrow_{\mathcal{B}, \text{only}}(\mathcal{E}_1) = \emptyset$  and hence  $|V| = 0$ .

To prove the general inductive step from  $l_1 - 1$  to  $l_1$ , we begin with the case when  $k_{int} = 0$ . So, let  $\mathcal{B}$  be a blob without internal reticulations, let  $\mathcal{E}$  be its set of exit reticulations, and let  $\mathcal{E}_1 = \{H_1, \dots, H_{l_1}\} \subseteq \mathcal{E}$  with  $l_1 \geq 1$ . Let us assume, as induction hypothesis, that the thesis is true for all blobs  $\mathcal{B}'$  without internal reticulations and for all subsets of exit reticulations  $\mathcal{E}'_1$  of  $\mathcal{B}'$  of cardinality  $|\mathcal{E}'_1| = l_1 - 1$ .

Take a node  $H_{l_1} \in \mathcal{E}_1$ , with parents  $u_1, \dots, u_{d_{l_1}}$ . For each  $i = 1, \dots, d_{l_1}$ , let  $v_i$  be the lowest ancestor of  $u_i$  that has some descendant (exit) reticulation other than  $H_{l_1}$ ; see Figure 9. Concatenating each path  $v_i \rightsquigarrow u_i$  with the corresponding arc  $(u_i, H_{l_1})$ , we obtain  $d_{l_1}$  different paths  $v_1 \rightsquigarrow H_{l_1}, \dots, v_{d_{l_1}} \rightsquigarrow H_{l_1}$  ending in  $H_{l_1}$ : observe that the nodes  $v_1, \dots, v_{d_{l_1}}$  need not be different, but each such path ends in a different arc  $(u_i, H_{l_1})$ .

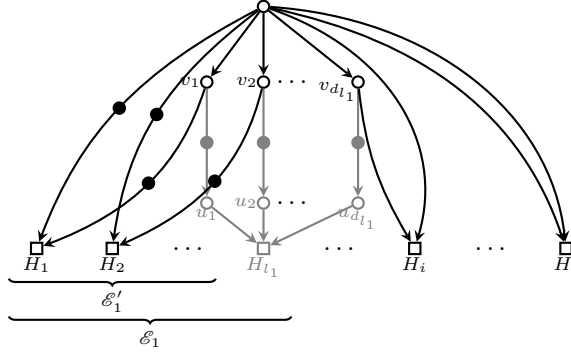

**Fig. 8** A semibinary blob  $\mathcal{B}$  without internal reticulations illustrating the inductive step for  $k_{int} = 0$  in the proof of Lemma 11. All arcs in it except those ending in  $H_{l_1}$  actually represent paths. An independent set of nodes in  $\uparrow_{\mathcal{B}, \text{only}}(\mathcal{E}_1)$  is represented by filled circles, and the nodes and arcs that are removed from  $\mathcal{B}$  to  $\mathcal{B}'$  are represented in gray.

Let  $\mathcal{B}'$  be the directed graph obtained by removing from  $\mathcal{B}$  the set of nodes  $\uparrow_{\mathcal{B}, \text{only}} H_{l_1}$  —that is, the reticulation  $H_{l_1}$  and the intermediate nodes of the paths  $v_1 \rightsquigarrow H_{l_1}, \dots, v_{d_{l_1}} \rightsquigarrow H_{l_1}$ — together with the arcs incident to them. The set of exit reticulations of  $\mathcal{B}'$  is  $\mathcal{E}' = \mathcal{E} \setminus \{H_{l_1}\}$ ; take  $\mathcal{E}'_1 = \{H_1, \dots, H_{l_1-1}\}$ . Since  $\mathcal{B}$  did not have internal reticulations, neither does  $\mathcal{B}'$ . Then, by the induction hypothesis,  $|V'| \leq \sum_{i=1}^{l_1-1} d_i$  for every independent set  $V' \subseteq \uparrow_{\mathcal{B}', \text{only}}(\mathcal{E}'_1)$ .

Now, since  $V(\mathcal{B}) = V(\mathcal{B}') \sqcup \uparrow_{\mathcal{B}, \text{only}} H_{l_1}$ , we have that

$$\uparrow_{\mathcal{B}, \text{only}}(\mathcal{E}_1) = \uparrow_{\mathcal{B}', \text{only}}(\mathcal{E}'_1) \sqcup \uparrow_{\mathcal{B}, \text{only}} H_{l_1}.$$

Therefore, any independent subset  $V'$  of  $\uparrow_{\mathcal{B}', \text{only}}(\mathcal{E}'_1)$  can be enlarged to an independent subset  $V$  of  $\uparrow_{\mathcal{B}, \text{only}}(\mathcal{E}_1)$  by adding at most  $d_{l_1}$  nodes, one inside each path  $v_i \rightsquigarrow H_{l_1}$ . Conversely, if we remove from an independent set of nodes  $V$  in  $\mathcal{B}$  its nodes that are intermediate in the paths  $v_1 \rightsquigarrow H_{l_1}, \dots, v_{d_{l_1}} \rightsquigarrow H_{l_1}$  (and by the independence condition each such path will contain at most one element of  $V$  and therefore we remove in this way at most  $d_{l_1}$  nodes), or the node  $H_{l_1}$  if it belongs to  $V$  (and then no intermediate node in any path  $v_i \rightsquigarrow H_{l_1}$  will belong to  $V$ ), we obtain an independent subset  $V'$  of  $\mathcal{B}'$ .

Then, since  $|V'| \leq \sum_{i=1}^{l_1-1} d_i$ , any independent subset of  $\uparrow_{\mathcal{B}, \text{only}}(\mathcal{E}_1)$  has cardinality at most  $\sum_{i=1}^{l_1-1} d_i + d_{l_1}$ . This proves this inductive step when  $k_{\text{int}} = 0$ .

Let us prove now, for any fixed  $l_1 > 0$ , the inductive step from  $k_{\text{int}} - 1$  to  $k_{\text{int}}$ . So, assume that the thesis in the statement is true for all blobs  $\mathcal{B}'$  with  $k_{\text{int}} - 1$  internal reticulations and subsets  $\mathcal{E}'_1$  of exit reticulations of cardinality  $|\mathcal{E}'_1| \leq l_1$ , and let  $\mathcal{B}$  be a blob with  $k_{\text{int}}$  internal reticulations and  $\mathcal{E}_1 = \{H_1, \dots, H_{l_1}\}$  a set of  $l_1 \geq 1$  exit reticulations. Let  $\mathcal{I}_1 = \mathcal{I} \cap \uparrow_{\mathcal{B}, \text{only}}(\mathcal{E}_1) = \{H_{l_1+1}, \dots, H_{l_1+k_1}\}$ .

Let  $H$  be an internal reticulation with no reticulate proper ancestor and let  $u_1, \dots, u_d$  be its parents. For each  $i = 1, \dots, d$ , let  $v_i$  be the lowest ancestor of  $u_i$  with some path to an exit reticulation that does not contain  $H$ . Concatenating each path  $v_i \rightsquigarrow u_i$  with the corresponding arc  $(u_i, H)$ , we obtain  $d$  different paths  $v_1 \rightsquigarrow H, \dots, v_d \rightsquigarrow H$  ending in  $H$ : as before, observe that the nodes  $v_1, \dots, v_d$  need not be different, but each such path ends in a different arc  $(u_i, H)$ .

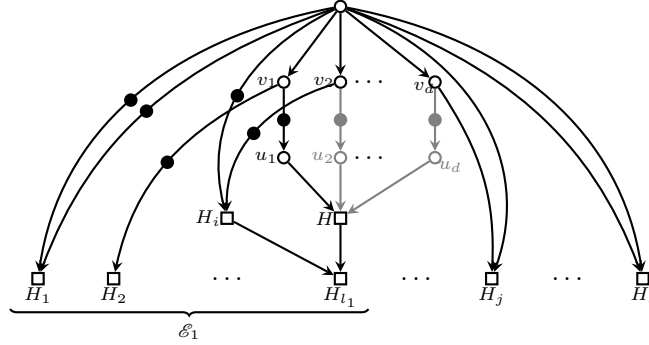

**Fig. 9** A semibinary blob  $\mathcal{B}$  illustrating the inductive step from  $k_{\text{int}} - 1$  to  $k_{\text{int}}$  in the proof of Lemma 11. All arcs in it except those ending in  $H$  actually represent paths. An independent set of nodes in  $\uparrow_{\mathcal{B}, \text{only}}(\mathcal{E}_1)$  is represented by filled circles. The nodes and arcs removed from  $N$  to  $N'$  are represented in gray.

Let  $\mathcal{B}'$  be the directed graph obtained by removing the intermediate nodes in all paths  $v_i \rightsquigarrow H$  except for one path  $v_1 \rightsquigarrow H$ , together with the arcs incident to them; if  $v_i = u_i$ , we simply remove the arc  $(u_i, H)$ . The blob  $\mathcal{B}'$  still has the same set of exit reticulations  $\mathcal{E}$  as  $\mathcal{B}$ , but it has  $k_{\text{int}} - 1$  internal reticulations because  $H$  has become an elementary tree node in  $\mathcal{B}'$ . Moreover, if we denote by  $\mathcal{I}'_1$  the set of internal reticulations in  $\uparrow_{\mathcal{B}', \text{only}}(\mathcal{E}_1)$ , then  $\mathcal{I}'_1 = \mathcal{I}_1$  if  $H \notin \mathcal{I}_1$  and  $\mathcal{I}'_1 = \mathcal{I}_1 \setminus \{H\}$  if  $H \in \mathcal{I}_1$ . If

this last case happens, let us assume without any loss of generality that  $H = H_{l_1+k_1}$  and hence that  $d = d_{l_1+k_1}$ .

Then, by the induction hypothesis, for every independent set  $V' \subseteq \uparrow_{\mathcal{B}', \text{only}}(\mathcal{E}_1)$

$$|V'| \leq \begin{cases} \sum_{i=1}^{l_1} d_i + \sum_{i=l_1+1}^{l_1+k_1} (d_i - 1) & \text{if } H \notin \mathcal{I}_1 \\ \sum_{i=1}^{l_1} d_i + \sum_{i=l_1+1}^{l_1+k_1-1} (d_i - 1) & \text{if } H = H_{l_1+k_1} \in \mathcal{I}_1 \end{cases} \quad (16)$$

Now, notice that any independent set of nodes  $V'$  in  $\mathcal{B}'$  can be enlarged to an independent set of nodes  $V$  in  $\mathcal{B}$  by adding at most one node inside each one of the  $d - 1$  removed paths  $v_i \rightsquigarrow H$ . Conversely, if we remove from an independent subset  $V$  of  $\mathcal{B}$  its nodes that are intermediate in the  $d - 1$  removed paths  $v_i \rightsquigarrow H$  (and by the independence condition each such path will contain at most one element of  $V$  and therefore we are removing in this way at most  $d$  nodes from  $V$ ), we obtain an independent subset  $V'$  of  $\mathcal{B}'$ . Then:

- If  $H \notin \uparrow_{\mathcal{B}, \text{only}}(\mathcal{E}_1)$ , any maximal independent subset of  $\uparrow_{\mathcal{B}', \text{only}}(\mathcal{E}_1)$  is also a maximal independent subset of  $\uparrow_{\mathcal{B}, \text{only}}(\mathcal{E}_1)$ . Then, by Eqn. (16), for every maximal independent set  $V \subseteq \uparrow_{\mathcal{B}, \text{only}}(\mathcal{E}_1)$

$$|V| \leq \sum_{i=1}^{l_1} d_i + \sum_{i=l_1+1}^{l_1+k_1} (d_i - 1).$$

- If  $H = H_{l_1+k_1} \in \uparrow_{\mathcal{B}, \text{only}}(\mathcal{E}_1)$ , any maximal independent subset of  $\uparrow_{\mathcal{B}', \text{only}}(\mathcal{E}_1)$  can be enlarged to a maximal independent subset of  $\uparrow_{\mathcal{B}, \text{only}}(\mathcal{E}_1)$  by adding at most  $d_{l_1+k_1} - 1$  nodes. Then, by Eqn. (16),

$$|V| \leq \sum_{i=1}^{l_1} d_i + \sum_{i=l_1+1}^{l_1+k_1-1} (d_i - 1) + (d_{l_1+k_1} - 1)$$

for every maximal independent set  $V \subseteq \uparrow_{\mathcal{B}, \text{only}}(\mathcal{E}_1)$ .

This finishes the proof of the inductive step.  $\square$

Returning to Lemma 9, if  $\mathcal{B}$  is a semi- $d$ -ary  $k$ -blob with  $l$  exit reticulations and  $|\mathcal{E}_1| = l_1$ , then each reticulation has in-degree at most  $d$  and  $|\mathcal{I}_1| \leq k - l$ , and then

$$|V| \leq \sum_{H_i \in \mathcal{E}_1} \deg_{in} H_i + \sum_{H_i \in \mathcal{I}_1} (\deg_{in} H_i - 1) \leq |\mathcal{E}_1| \cdot d + (k - |\mathcal{E}_1|)(d - 1)$$

as states Lemma 9.

## 2 Proof of Corollary 2

We first prove a refinement of Lemma 10 for level-1 networks.

**Lemma 12.** *Let  $\mathcal{B}$  be a semi- $d$ -ary level-1 blob with exit reticulation  $H$  and let  $X, X'$  be two multisets of nodes of  $\mathcal{B}$  with  $|X'| < |X|$  satisfying the following two further conditions:*

- (i) *For each  $v \in V(\mathcal{B})$ , if  $m_{X'}(v) < m_X(v)$ , then  $m_X(v) = 1$  and  $m_{X'}(v) = 0$ .*
- (ii)  *$H \in X \cup X'$ .*

Then

$$\uparrow X \cap \uparrow X' \subseteq \uparrow \tau_{A,B}(X) \cap \uparrow \tau_{B,A}(X') \quad (17)$$

for some subsets  $A \subseteq \text{Supp } X \setminus \text{Supp } X'$  and  $B \subseteq \{H\} \cap (\text{Supp } X' \setminus \text{Supp } X)$  such that either  $B = \emptyset$  and  $|A| = 1$ , or  $B = \{H\}$  and  $1 < |A| \leq d$ .

*Proof.* Using the same notations as in the proof of Lemma 10, observe that the Eqn. (6) therein holds identically in this case, i.e.,

$$0 < |X| - |X'| \leq |\widehat{X}| - |\widehat{X}'|. \quad (18)$$

In addition,  $\mathcal{E} = \{H\}$ . Now consider the following cases:

(a) If there exists some  $x \in \widehat{X}$  with a proper descendant in  $X$ , then  $A = \{x\}$ ,  $B = \emptyset$  satisfy the required properties as proved in case (a) of Lemma 10.

(b) If  $H \in X$  and no  $x \in \widehat{X}$  has any proper descendant in  $X$ , then  $\widehat{X} = \{H\}$ , and then  $\widehat{X}' = \emptyset$  by Eqn. (18) and  $\uparrow X' = \uparrow(X \setminus \{H\})$  because, since  $\widehat{X}' = \emptyset$ ,  $X' = X \setminus \widehat{X} = X \setminus \{H\}$ . Then,  $A = \{H\}$  and  $B = \emptyset$  satisfy the required properties.

(c) If  $H \notin X$  and no  $x \in \widehat{X}$  has any proper descendant in  $X$ , then, on the one hand,  $H$  belongs to  $\text{Supp } X' \setminus \text{Supp } X$  by condition (ii), and hence  $H \in \widehat{X}'$ , and, on the other hand,  $\widehat{X}$  is an independent set of at most  $d$  nodes (because there are at most  $d$  different paths from the root to  $H$ ).

For brevity, let  $X''$  denote the full sub-multiset of  $X'$  supported on  $\text{Supp } X' \setminus \{H\}$ . By Eqn. (18),

$$|\widehat{X}| > |\widehat{X}'| \geq |\text{Supp } X'| = |\text{Supp } X''| + 1$$

and thus  $|\widehat{X}| \geq |\text{Supp } X''| + 2$ . Now, since  $\mathcal{B}$  does not contain internal reticulations and the nodes in  $\widehat{X}$  are independent, each node in  $X''$  has at most one ancestor in  $\widehat{X}$ . This implies that  $|\widehat{X} \cap \uparrow X''| \leq |\text{Supp } X''|$  and hence

$$|\text{Supp } X''| + 2 \leq |\widehat{X}| = |\widehat{X} \cap \uparrow X''| + |\widehat{X} \setminus \uparrow X''| \leq |\text{Supp } X''| + |\widehat{X} \setminus \uparrow X''|,$$

which implies  $|\widehat{X} \setminus \uparrow X''| \geq 2$ .

Take then  $A = \widehat{X} \setminus \uparrow X''$  and  $B = \{H\}$ . As we have just seen,  $2 \leq |A| \leq |\widehat{X}| \leq d$ . Thus,  $A, B$  satisfy the required properties in the statement. As far as Eqn. (17) goes, that is,

$$\uparrow X \cap \uparrow X' \subseteq \uparrow((X \setminus A) \cup \{H\}) \cap \uparrow((X' \setminus \{H\}) \cup A),$$

observe that, since  $H$  is the only exit reticulation of  $\mathcal{B}$ ,  $\uparrow H = V(\mathcal{B})$  and hence  $\uparrow X' = \uparrow((X \setminus A) \cup \{H\}) = V(\mathcal{B})$ . So, we actually must prove that

$$\uparrow X \subseteq \uparrow(X' \setminus \{H\}) \cup \uparrow A.$$

We must consider two cases.

- If  $m_{X'}(H) > 1$ , then  $H \in X' \setminus \{H\}$  and thus  $\uparrow(X' \setminus \{H\}) = V(\mathcal{B})$  and the desired inclusion is obvious.
- If  $m_{X'}(H) = 1$ , then  $X' \setminus \{H\} = X''$ , and in this case

$$\begin{aligned} \uparrow X &= \uparrow \widehat{X} \cup \uparrow(X \setminus \widehat{X}) = \uparrow(\widehat{X} \cap \uparrow X'') \cup \uparrow(\widehat{X} \setminus \uparrow X'') \cup \uparrow(X' \setminus \widehat{X}') \\ &\subseteq \uparrow X'' \cup \uparrow A \cup \uparrow(X' \setminus \{H\}) = \uparrow(X' \setminus \{H\}) \cup \uparrow A \end{aligned}$$

as desired.

This finishes the proof of case (c).  $\square$

We can proceed now with the proof of Corollary 2. Arguing as in the proof of Theorem 1, we can assume that  $N$  is at-most-bifurcating and in particular that no node in  $N$  is the split node of more than one blob. Notice moreover that now each blob has only one reticulation: its exit reticulation.

We follow the proof of Theorem 1 by induction on the number  $\alpha$  of arcs of the network. The base case  $\alpha = 0$  is again obvious, and thus we must only consider the inductive step. So, let  $N$  be a semi- $d$ -ary level-1 phylogenetic network on  $\Sigma$  with more than one arc, and let  $X, X' \subseteq \Sigma$  with  $|X'| < |X|$ . If  $|X| = 1$  the exchange property is trivially satisfied taking  $(A, B) = (X, \emptyset) \in \mathcal{S}_0$ , so we assume  $|X| \geq 2$ .

Arguing as in cases (a), (b) and (c.1) in the proof of Theorem 1, we can assume that:

- (i) *The root  $r$  is the split node of a single, semi- $d$ -ary blob  $\mathcal{B}$ .*
- (ii) *For every node  $v$  in  $\mathcal{B}$ , if  $v$  has a child  $\bar{v}$  outside  $\mathcal{B}$  such that  $|X \cap C(\bar{v})| > |X' \cap C(\bar{v})|$ , then  $|X \cap C(\bar{v})| = 1$  and  $|X' \cap C(\bar{v})| = 0$ .*
- (iii)  $C(H) \cap (X \cup X') \neq \emptyset$ .

We use henceforth the same notations as in point (c.2) in the proof of that theorem. The hypotheses of Lemma 12 are satisfied by  $\mathcal{B}_X^*$  and  $\mathcal{B}_{X'}^*$ . Then, there exist two sets  $\mathcal{B}_A, \mathcal{B}_B \subseteq V(\mathcal{B})$  such that  $\mathcal{B}_A \subseteq \text{Supp } \mathcal{B}_X^* \setminus \text{Supp } \mathcal{B}_{X'}^*$ ,  $\mathcal{B}_B \subseteq \{H\} \cap (\text{Supp } \mathcal{B}_{X'}^* \setminus \text{Supp } \mathcal{B}_X^*)$ ,  $|\mathcal{B}_B| = 0$  and  $|\mathcal{B}_A| = 1$ , or  $|\mathcal{B}_B| = 1 < |\mathcal{B}_A| \leq d$ , and

$$\uparrow \mathcal{B}_X^* \cap \uparrow \mathcal{B}_{X'}^* \subseteq \uparrow \tau_{\mathcal{B}_A, \mathcal{B}_B}(\mathcal{B}_X^*) \cap \uparrow \tau_{\mathcal{B}_B, \mathcal{B}_A}(\mathcal{B}_{X'}^*). \quad (19)$$

Now take  $A = \bigcup_{v \in \mathcal{B}_A} (X \cap C(\bar{v}))$  and, if  $\mathcal{B}_B = \{H\}$ , choose any  $b \in X' \cap C(H)$  and take  $B = \{b\}$ , while if  $\mathcal{B}_B = \emptyset$ , take  $B = \emptyset$ . Notice that if  $B = \emptyset$ , then  $|\mathcal{B}_A| = 1$  and hence  $|A| = 1$ , while, if  $|B| = 1$ , then  $H \in \text{Supp } \mathcal{B}_{X'}^* \setminus \text{Supp } \mathcal{B}_X^*$  and hence  $X \cap C(H) = \emptyset$ .

These sets satisfy  $|A| = |\mathcal{B}_A|$ ,  $|B| = |\mathcal{B}_B|$  and thus  $(A, B) \in \mathcal{S}_d$ . Now, arguing as in the proof of Theorem 1, we have  $\mathcal{B}_A = \mathcal{B}_A^*$ ,  $\mathcal{B}_B = \mathcal{B}_B^*$ , and

$$\begin{aligned} \tau_{\mathcal{B}_A, \mathcal{B}_B}(\mathcal{B}_X^*) &= \mathcal{B}_{\tau_{\mathcal{B}_A, \mathcal{B}_B}(X)}^* \text{ and } \text{Supp } \mathcal{B}_{\tau_{\mathcal{B}_A, \mathcal{B}_B}(X)}^* = ((\text{Supp } \mathcal{B}_X^*) \setminus \mathcal{B}_A) \cup \mathcal{B}_B, & (20) \\ \tau_{\mathcal{B}_B, \mathcal{B}_A}(\mathcal{B}_{X'}^*) &= \mathcal{B}_{\tau_{\mathcal{B}_B, \mathcal{B}_A}(X')}^* \text{ and } \text{Supp } \mathcal{B}_{\tau_{\mathcal{B}_B, \mathcal{B}_A}(X')}^* = \text{Supp } \mathcal{B}_{X' \setminus B} \cup \mathcal{B}_A \\ &\supseteq ((\text{Supp } \mathcal{B}_{X'}^*) \setminus \mathcal{B}_B) \cup \mathcal{B}_A & (21) \end{aligned}$$

(where the inclusion in (21) is not an equality if  $\mathcal{B}_B = \{H\}$  and  $m_{\mathcal{B}_{X'}^*}(H) = |X' \cap C(H)| > 1 = m_{\mathcal{B}_B}(H)$ ) and, still arguing as in the aforementioned proof,

$$\begin{aligned} \text{rPSD}_N(X) - \text{rPSD}_N(\tau_{A,B}(X)) &= \\ &= \sum_{v \in \mathcal{B}_A^*} \text{rPSD}_{\bar{N}_v}(A) - \sum_{v \in \mathcal{B}_B^*} \text{rPSD}_{\bar{N}_v}(B) + \sum_{e \in \uparrow \mathcal{B}_X^*} w(e) - \sum_{e \in \uparrow \mathcal{B}_{\tau_{A,B}(X)}^*} w(e). \end{aligned}$$

Now, the difference between Eqn. (21) above and Eqn. (12) in the proof of Theorem 1 makes dealing with  $\text{rPSD}_N(\tau_{B,A}(X')) - \text{rPSD}_N(X')$  different here from in the aforementioned proof. In the current situation, we have that

$$\begin{aligned} \sum_{v \in \text{Supp } \mathcal{B}_{\tau_{B,A}(X')}^*} \text{rPSD}_{\bar{N}_v}(\tau_{B,A}(X')) &= \\ &= \sum_{v \in \text{Supp } \mathcal{B}_{X' \setminus B}^*} \text{rPSD}_{\bar{N}_v}((X' \setminus B) \cup A) + \sum_{v \in \mathcal{B}_A} \text{rPSD}_{\bar{N}_v}((X' \setminus B) \cup A) \\ &= \sum_{v \in \text{Supp } \mathcal{B}_{X' \setminus B}^*} \text{rPSD}_{\bar{N}_v}(X' \setminus B) + \sum_{v \in \mathcal{B}_A} \text{rPSD}_{\bar{N}_v}(A) \end{aligned}$$

(because, if  $v \in \mathcal{B}_{X' \setminus B}^*$ , then  $A \cap C(\bar{v}) = \emptyset$ , and if  $v \in \mathcal{B}_A$ , then  $X' \cap C(\bar{v}) = \emptyset$ );

$$\begin{aligned} \sum_{v \in \text{Supp } \mathcal{B}_{X'}^*} \text{rPSD}_{\bar{N}_v}(X') &= \sum_{v \in (\text{Supp } \mathcal{B}_{X'}^*) \setminus \mathcal{B}_B} \text{rPSD}_{\bar{N}_v}(X') + \sum_{v \in \mathcal{B}_B} \text{rPSD}_{\bar{N}_v}(X') \\ &\leq \sum_{v \in (\text{Supp } \mathcal{B}_{X'}^*) \setminus \mathcal{B}_B} \text{rPSD}_{\bar{N}_v}(X') + \sum_{v \in \mathcal{B}_B} \text{rPSD}_{\bar{N}_v}(X' \setminus B) + \sum_{v \in \mathcal{B}_B} \text{rPSD}_{\bar{N}_v}(B) \\ &\text{(by the subadditivity of rPSD)} \\ &= \sum_{v \in (\text{Supp } \mathcal{B}_{X'}^*) \setminus \mathcal{B}_B} \text{rPSD}_{\bar{N}_v}(X' \setminus B) + \sum_{v \in \mathcal{B}_B} \text{rPSD}_{\bar{N}_v}(X' \setminus B) + \sum_{v \in \mathcal{B}_B} \text{rPSD}_{\bar{N}_v}(B) \\ &\text{(because, } B \cap C(\bar{v}) = \emptyset \text{ if } v \notin \mathcal{B}_B) \\ &= \sum_{v \in \text{Supp } \mathcal{B}_{X' \setminus B}^*} \text{rPSD}_{\bar{N}_v}(X' \setminus B) + \sum_{v \in \mathcal{B}_B} \text{rPSD}_{\bar{N}_v}(B); \end{aligned}$$

and then

$$\begin{aligned} \text{rPSD}_N(\tau_{B,A}(X')) - \text{rPSD}_N(X') &= \\ &= \sum_{v \in \text{Supp } \mathcal{B}_{\tau_{B,A}(X')}^*} \text{rPSD}_{\bar{N}_v}(\tau_{B,A}(X')) - \sum_{v \in \text{Supp } \mathcal{B}_{X'}^*} \text{rPSD}_{\bar{N}_v}(X') + \sum_{e \in \uparrow \mathcal{B}_{\tau_{B,A}(X')}^*} w(e) - \sum_{e \in \uparrow \mathcal{B}_{X'}^*} w(e) \\ &\geq \sum_{v \in \text{Supp } \mathcal{B}_{X' \setminus B}^*} \text{rPSD}_{\bar{N}_v}(X' \setminus B) + \sum_{v \in \mathcal{B}_A} \text{rPSD}_{\bar{N}_v}(A) \end{aligned}$$

$$\begin{aligned}
& - \sum_{v \in \text{Supp } \mathcal{B}_{X' \setminus B}^*} \text{rPSD}_{\overline{N}_v}(X' \setminus B) - \sum_{v \in \mathcal{B}_B} \text{rPSD}_{\overline{N}_v}(B) + \sum_{e \in \uparrow \mathcal{B}_{\tau_{B,A}(X')}^*} w(e) - \sum_{e \in \uparrow \mathcal{B}_{X'}^*} w(e). \\
& = \sum_{v \in \mathcal{B}_A} \text{rPSD}_{\overline{N}_v}(A) - \sum_{v \in \mathcal{B}_B} \text{rPSD}_{\overline{N}_v}(B) + \sum_{e \in \uparrow \mathcal{B}_{\tau_{B,A}(X')}^*} w(e) - \sum_{e \in \uparrow \mathcal{B}_{X'}^*} w(e).
\end{aligned}$$

Then, as in Theorem 1, we conclude that

$$\text{rPSD}_N(X) - \text{rPSD}_N(\tau_{A,B}(X)) \leq \text{rPSD}_N(\tau_{B,A}(X')) - \text{rPSD}_N(X')$$

if

$$\sum_{e \in \uparrow \mathcal{B}_X^*} w(e) - \sum_{e \in \uparrow \mathcal{B}_{\tau_{A,B}(X)}^*} w(e) \leq \sum_{e \in \uparrow \mathcal{B}_{\tau_{B,A}(X')}^*} w(e) - \sum_{e \in \uparrow \mathcal{B}_{X'}^*} w(e),$$

and this last inequality is deduced from Eqn. (19) as in the proof of Theorem 1.

### 3 Proof of Proposition 8

To begin with, notice that

$$\begin{aligned}
\mathcal{S}_{2,3} &= \mathcal{S}_0 \cup \{(A, B) \in \mathcal{P}(\Sigma)^2 : 1 \leq |B| < |A| < 6, |A| - |B| \leq 4\}, \\
\mathcal{S}_{1,5} &= \mathcal{S}_0 \cup \{(A, B) \in \mathcal{P}(\Sigma)^2 : 1 \leq |B| < |A| \leq 5\}
\end{aligned}$$

and therefore  $\mathcal{S}_{1,5} = \mathcal{S}_{2,3}$ . To simplify the notation, we shall abbreviate  $\text{Opt-}\tau_{1,5,j}$  =  $\text{Opt-}\tau_{2,3,j}$  by simply  $\text{Opt-}\tau_j$ . Observe that in both cases considered in the statement  $j$  can go from 1 to 4.

Let  $Y$  be an optimal sequence of  $N$  and fix  $1 < m \leq n$ . To ease the task of the reader, we sketch the flow of the proof in Figure 10.

By Theorem 1,

$$(m, m-1) \prec^Y (m-j_1, m-1+j_1) \tag{22}$$

for some  $j_1 \in \{1, 2, 3, 4\}$ .

- (1) If  $j_1 = 1$ , then, we conclude as in (1) in the proof of Proposition 6 that  $Y_m \in \text{Opt-}\tau_1(\text{Opt}_{m-1})$  and  $Y_{m-1} \in \text{Opt-}\tau_1^{-1}(\text{Opt}_m)$ .
- (2) If  $j_1 = 2$ , then  $(m-j_1, m-1+j_1) = (m-2, m+1)$ . Applying Theorem 1 again,

$$(m+1, m-2) \prec^Y (m+1-j_2, m-2+j_2),$$

for some  $j_2 \in \{1, 2, 3, 4\}$ .

- (2.a) If  $j_2 = 1$  or  $j_2 = 2$ , we conclude as in (2) in the proof of Proposition 6 that  $Y_m \in \text{Opt-}\tau_2(\text{Opt}_{m-2})$  and  $Y_{m-1} \in \text{Opt-}\tau_2^{-1}(\text{Opt}_{m+1})$ .
- (2.b) When  $j_2 = 3$ , we have  $(m+1, m-2) \prec^Y (m-2, m+1)$  and, as in (2.b) in the proof of Proposition 6, we can only conclude that  $Y_{m+1} \in \text{Opt-}\tau_3(\text{Opt}_{m-2})$  and  $Y_{m-2} \in \text{Opt-}\tau_3^{-1}(\text{Opt}_{m+1})$ .



$$(m, m-1) \left\{ \begin{array}{l} \leftarrow_1^Y (m-1, m) \Rightarrow (a) \\ \leftarrow_2^Y \{m+1, m-2\} \left\{ \begin{array}{l} \leftarrow_{1,2}^Y \{m, m-1\} \Rightarrow (a) \\ \leftarrow_3^Y \{m-2, m+1\} \Rightarrow (b) \\ \leftarrow_4^Y \{m-3, m+2\} \left\{ \begin{array}{l} \leftarrow_{1,4}^Y \{m+1, m-2\} \Rightarrow (b) \\ \leftarrow_{2,3}^Y \{m, m-1\} \Rightarrow (a) \end{array} \right. \end{array} \right. \\ \leftarrow_3^Y \{m+2, m-3\} \left\{ \begin{array}{l} \leftarrow_1^Y (m+1, m-2) \left\{ \begin{array}{l} \leftarrow_{1,2}^Y \{m, m-1\} \Rightarrow (a) \\ \leftarrow_3^Y \{m-2, m+1\} \Rightarrow (b) \\ \leftarrow_4^Y \{m-3, m+2\} \left\{ \begin{array}{l} \leftarrow_{1,4}^Y \{m+1, m-2\} \Rightarrow (b) \\ \leftarrow_{2,3}^Y \{m, m-1\} \Rightarrow (a) \end{array} \right. \end{array} \right. \\ \leftarrow_{2,3}^Y \{m, m-1\} \Rightarrow (a) \end{array} \right. \\ \leftarrow_4^Y \{m-2, m+1\} \left\{ \begin{array}{l} \leftarrow_{1,2}^Y \{m, m-1\} \Rightarrow (a) \\ \leftarrow_3^Y \{m-2, m+1\} \Rightarrow (b) \\ \leftarrow_4^Y \{m-3, m+2\} \Rightarrow (a) \text{ or } (b) \text{ as after} \\ (m+2, m-3) \leftarrow_1^Y \{m+1, m-2\} \end{array} \right. \end{array} \right. \\ \leftarrow_4^Y \{m-4, m+3\} \left\{ \begin{array}{l} \leftarrow_{1,2}^Y \{m+2, m-3\} \Rightarrow (a) \text{ or } (b) \text{ as after } (m, m-1) \leftarrow_3^Y \{m+2, m-3\} \\ \leftarrow_{3,4}^Y \{m, m-1\} \Rightarrow (a) \end{array} \right. \end{array} \right.$$

**Fig. 10** Sketch of the proof of Proposition 8. To make the diagram shorter, we write  $(p, q) \leftarrow_{j_1, j_2}^Y \{p', q'\}$  to mean that  $(p, q) \leftarrow_{j_1}^Y \{p', q'\}$  or  $(p, q) \leftarrow_{j_2}^Y \{p', q'\}$ .

- (2.c) When  $j_2 = 4$ , we have  $(m+1, m-2) \leftarrow^Y (m-3, m+2)$ . Applying Theorem 1 again,

$$(m+2, m-3) \leftarrow^Y (m+2-j_3, m-3+j_3),$$

for some  $j_3 \in \{1, 2, 3, 4\}$ . Now:

- (2.c.i) If  $j_3 = 1$  or  $4$ ,  $\{m+2-j_3, m-3+j_3\} = \{m+1, m-2\}$  and, as in (2.b), we conclude that  $Y_{m+1} \in \text{Opt-}\tau_3(\text{Opt}_{m-2})$  and  $Y_{m-2} \in \text{Opt-}\tau_3^{-1}(\text{Opt}_{m+1})$ .  
(2.c.ii) If  $j_3 = 2$  or  $3$ ,  $\{m+2-j_3, m-3+j_3\} = \{m, m-1\}$  and, as in (2.a), we conclude that  $Y_m \in \text{Opt-}\tau_2(\text{Opt}_{m-2})$  and  $Y_{m-1} \in \text{Opt-}\tau_2^{-1}(\text{Opt}_{m+1})$ .  
(3) If  $j_1 = 3$ , then  $(m-j_1, m-1+j_1) = (m-3, m+2)$ . Applying Theorem 1 again,

$$(m+2, m-3) \leftarrow^Y (m+2-j_2, m-3+j_2),$$

for some  $j_2 \in \{1, 2, 3, 4\}$ .

- (3.a) If  $j_2 = 2$  or  $3$ ,  $\{m+2-j_2, m-3+j_2\} = \{m, m-1\}$ , closing the  $\leftarrow$ -chain initiated with (22). Then, by Corollary 5,  $Y_m \in \text{Opt-}\tau_3(\text{Opt}_{m-3})$  and  $Y_{m-1} \in \text{Opt-}\tau_3^{-1}(\text{Opt}_{m+2})$ .  
(3.b) If  $j_2 = 1$  or  $4$ ,  $\{m+2-j_2, m-3+j_2\} = \{m+1, m-2\}$ . But now we can follow as in case (2) and we conclude that one of the following situations must hold:  
•  $Y_m \in \text{Opt-}\tau_3(\text{Opt}_{m-3})$  and  $Y_{m-1} \in \text{Opt-}\tau_3^{-1}(\text{Opt}_{m+2})$ ,  
•  $Y_{m+1} \in \text{Opt-}\tau_3(\text{Opt}_{m-2})$  and  $Y_{m-2} \in \text{Opt-}\tau_3^{-1}(\text{Opt}_{m+1})$ .  
(4) If  $j_1 = 4$ , then  $(m-j_1, m-1+j_1) = (m-4, m+3)$ . Applying Theorem 1 again,

$$(m+3, m-4) \leftarrow^Y (m+3-j_2, m-4+j_2),$$

for some  $j_2 \in \{1, 2, 3, 4\}$ .

- (4.a) If  $j_2 = 3$  or  $4$ ,  $\{m+3-j_2, m-4+j_2\} = \{m, m-1\}$ , closing the  $\leftarrow$ -chain initiated with (22). Then, by Corollary 5,  $Y_m \in \text{Opt-}\tau_4(\text{Opt}_{m-4})$  and  $Y_{m-1} \in \text{Opt-}\tau_4^{-1}(\text{Opt}_{m+3})$ .
- (4.b) If  $j_2 = 1$ ,  $(m+3, m-4) \prec^Y (m+2, m-3)$  and we can follow as in (3), obtaining that one of the following situations must hold:
- $Y_m \in \text{Opt-}\tau_4(\text{Opt}_{m-4})$  and  $Y_{m-1} \in \text{Opt-}\tau_4^{-1}(\text{Opt}_{m+3})$ ,
  - $Y_{m+1} \in \text{Opt-}\tau_3(\text{Opt}_{m-2})$  and  $Y_{m-2} \in \text{Opt-}\tau_3^{-1}(\text{Opt}_{m+1})$ .
- (4.c) If  $j_2 = 2$ ,  $(m+3, m-4) \prec^Y (m+1, m-2)$  and we can follow as in (2), obtaining that one of the following situations must hold:
- $Y_m \in \text{Opt-}\tau_4(\text{Opt}_{m-4})$  and  $Y_{m-1} \in \text{Opt-}\tau_4^{-1}(\text{Opt}_{m+3})$ ,
  - $Y_{m+1} \in \text{Opt-}\tau_3(\text{Opt}_{m-2})$  and  $Y_{m-2} \in \text{Opt-}\tau_3^{-1}(\text{Opt}_{m+1})$ .

Summarizing, we have two possibilities: either

$$Y_m \in \bigcup_{j=1}^4 \text{Opt-}\tau_j(\text{Opt}_{m-j}) \text{ and } Y_{m-1} \in \bigcup_{j=1}^4 \text{Opt-}\tau_j^{-1}(\text{Opt}_{m-1+j})$$

or

$$Y_{m+1} \in \text{Opt-}\tau_3(\text{Opt}_{m-2}) \text{ and } \text{Opt-}\tau_3(Y_{m-2}) \subseteq \text{Opt}_{m+1}.$$

By the arbitrary choice of  $Y$  and  $m$ , this concludes the proof.

## 4 Some examples

**Example 4.** Consider the phylogenetic networks in Figure 11: above, a semi-4-ary level-1 network and below, a semibinary level-3 network.

In both cases we have the following optimal sets of leaves:

$$\begin{aligned} \text{Opt}_0 &: \emptyset \\ \text{Opt}_1 &: \{z_0\} \\ \text{Opt}_2 &: \{z_0, z_1\} \\ \text{Opt}_3 &: \{x_{12}, x_{13}, z_0\} \\ \text{Opt}_4 &: \{x_{11}, x_{12}, x_{13}, z_0\} \\ \text{Opt}_5 &: \{x_{00}, x_{01}, x_{02}, x_{03}, z_1\} \\ \text{Opt}_6 &: \{x_{00}, x_{01}, x_{02}, x_{03}, x_{12}, x_{13}\} \\ \text{Opt}_7 &: \{x_{00}, x_{01}, x_{02}, x_{03}, x_{11}, x_{12}, x_{13}\} \\ \text{Opt}_8 &: \{x_{00}, x_{01}, x_{02}, x_{03}, x_{10}, x_{11}, x_{12}, x_{13}\} \\ \text{Opt}_9 &: \{x_{00}, x_{01}, x_{02}, x_{03}, x_{10}, x_{11}, x_{12}, x_{13}, z_1\} \\ \text{Opt}_{10} &: \{x_{00}, x_{01}, x_{02}, x_{03}, x_{10}, x_{11}, x_{12}, x_{13}, z_0, z_1\} \end{aligned}$$

In the case of the semi-4-ary level-1 network we have

$$\text{Opt}_5 \not\subseteq \text{Opt-}\tau_1(\text{Opt}_4) \cup \text{Opt-}\tau_2(\text{Opt}_3) = \{\{x_{00}, x_{01}, x_{02}, x_{03}, x_{13}\}\}.$$

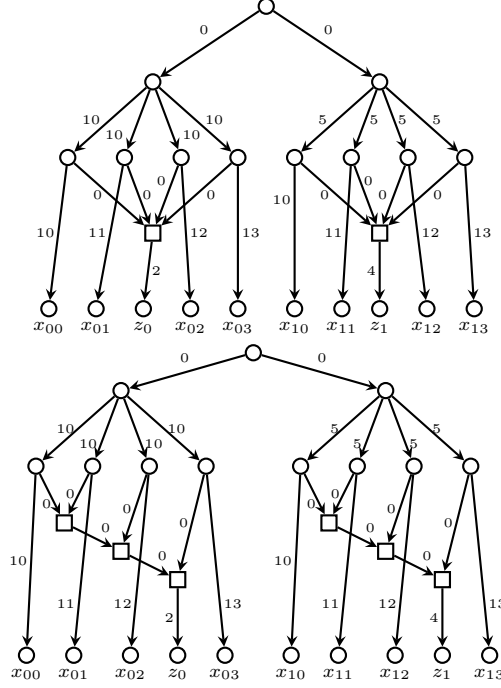

Fig. 11 The networks in Example 4.

However, for the level-3 network,  $\text{Opt}_m = \text{Opt}_{\tau_1}(\text{Opt}_{m-1})$  and  $\text{Opt}_m = \text{Opt}_{\tau_1^{-1}}(\text{Opt}_{m+1})$  for all  $1 \leq m \leq n = 10$  and  $0 \leq m < n$  respectively. This should not be surprising, because in Example 11 we showed that for this network (although with different weights) we can always find an rPSD-improving pair  $(A, B)$  with  $|A| - |B| = 1$ , hence the first case in the proof of Proposition 7 could always be chosen and prove that  $\text{Opt}_m \subseteq \text{Opt}_{\tau_1}(\text{Opt}_{m-1})$ .

As we mention in Example 4, if some network has some  $\text{Opt}_m$  not included into  $\bigcup_{j=1}^3 \text{Opt}_{\tau_{k,d,j}}(\text{Opt}_{m-j})$ , then that network has two sets of leaves  $X, X'$  with  $m = |X| = |X'| + 1$  and no rPSD-improving pairs  $(A, B)$  with  $|A| - |B| < 3$ . Otherwise, if we could always find some rPSD-improving pair with  $|A| - |B| < 3$ , the proof of Propositions 7 and 8 would never need to explore the cases  $j_1 \in \{3, 4\}$  and thus obtain a similar result to Proposition 6. In Example 5 we show a semi-5-ary network that has  $X = \{x_{00}, \dots, x_{04}, z_1\}$  and  $X' = \{x_{10}, \dots, x_{13}, z_0\}$  with only rPSD-improving pairs with  $|A| - |B| \geq 3$ , yet the obvious greedy algorithm would still work in this network. In contrast, we have not found any semibinary level-3 network that has some  $X, X' \subseteq \Sigma$  with  $|X| = |X'| + 1$  and no rPSD-improving pair  $(A, B)$  with  $|A| - |B| = 1$ . **Example 5.** The semi-5-ary level-1 network in Figure 12, analogous to the semi-4-ary network from Example 4, similarly has  $\{x_{00}, \dots, x_{04}, z_1\} \in \text{Opt}_6 \setminus \bigcup_{j=1}^3 \text{Opt}_{\tau_j}(\text{Opt}_{6-j})$  but still, for all  $1 \leq m \leq n$ ,  $\text{Opt}_m \subseteq \bigcup_{j=1}^4 \text{Opt}_{\tau_j}(\text{Opt}_{m-j})$ .

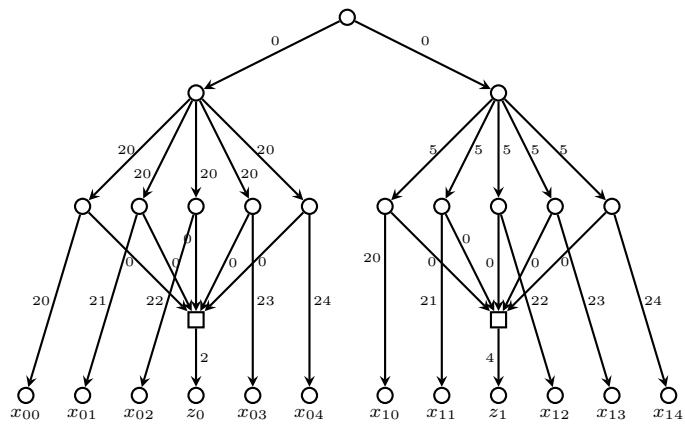

Fig. 12 The network in Example 5.
